# Supplementary material for: Pure ICL Implantation: A Novel Ophthalmic Viscosurgical Device-Free Technique
Source: Research Square preprint supplement (doi:10.21203/rs.3.rs-150626/v1), 2021-02-03
Supplement: Supplementary file 1 [file 5f92591eef36735b449f3165.docx]

**Video 1:** Video1-a to Video1-f is a complete surgical video.The details are as follows:

The ICL implant container was filled with BSS, and the ICL injector was installed properly for later use. Symmetrical assisted incisions were made on the right and left sides, approximately 0.4 mm wide, and the anterior chamber maintainer was placed in the left incision. A 3.0-mm transparent corneal main incision was performed on the steep axis of corneal curvature, to release corneal astigmatism. The ICL was inserted from the main incision into anterior chamber, then gently tucking the footplates beneath the iris and adjusting the ICL to a central position. Finally, the incisions were made watertight.
